# Supplementary material
Source: publisher site journal article supplement (https://www.dovepress.com/article/103648)
Supplement: Supplementary file 1 [file get_supplementary_file.php]

a

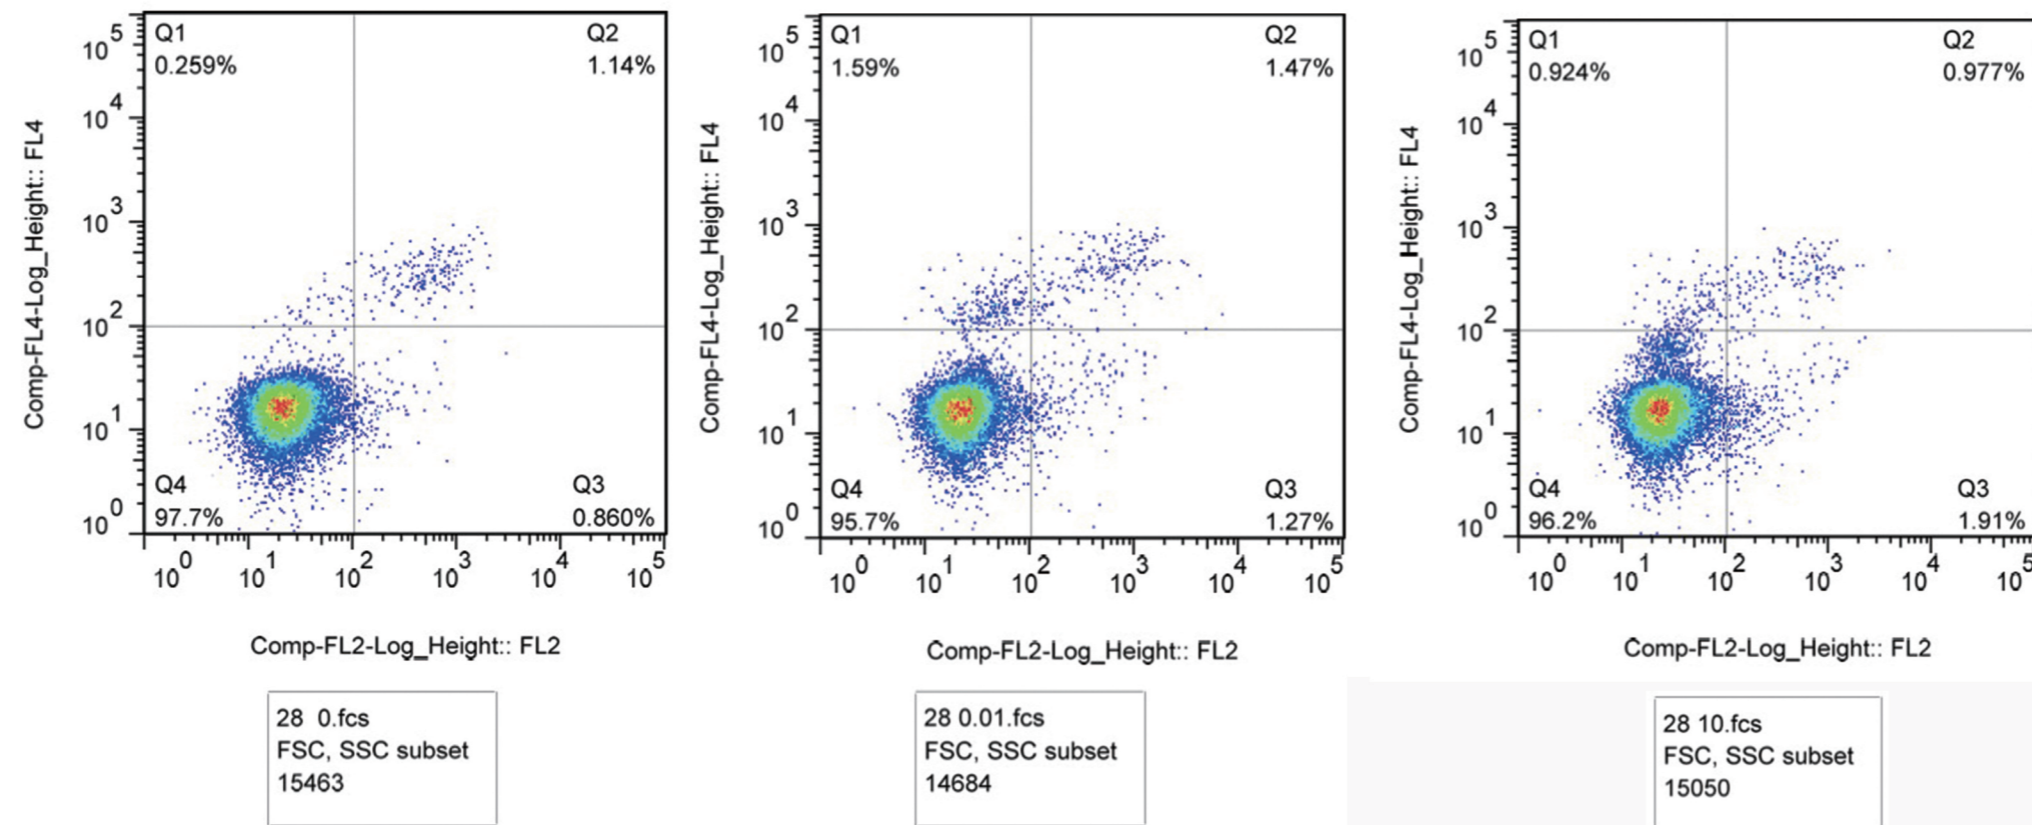

b

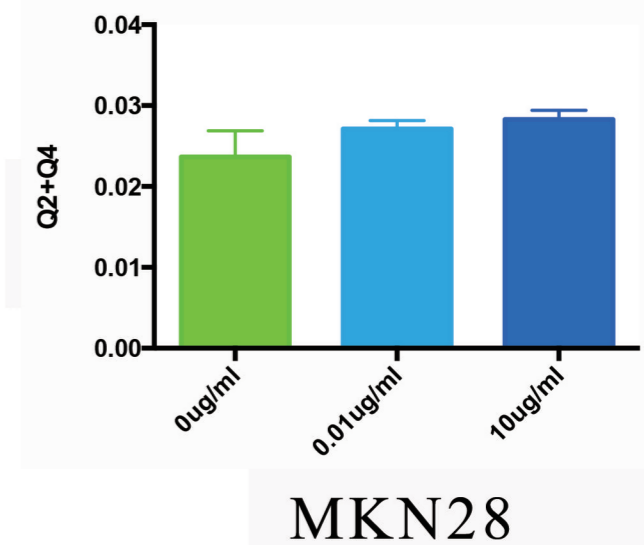

c

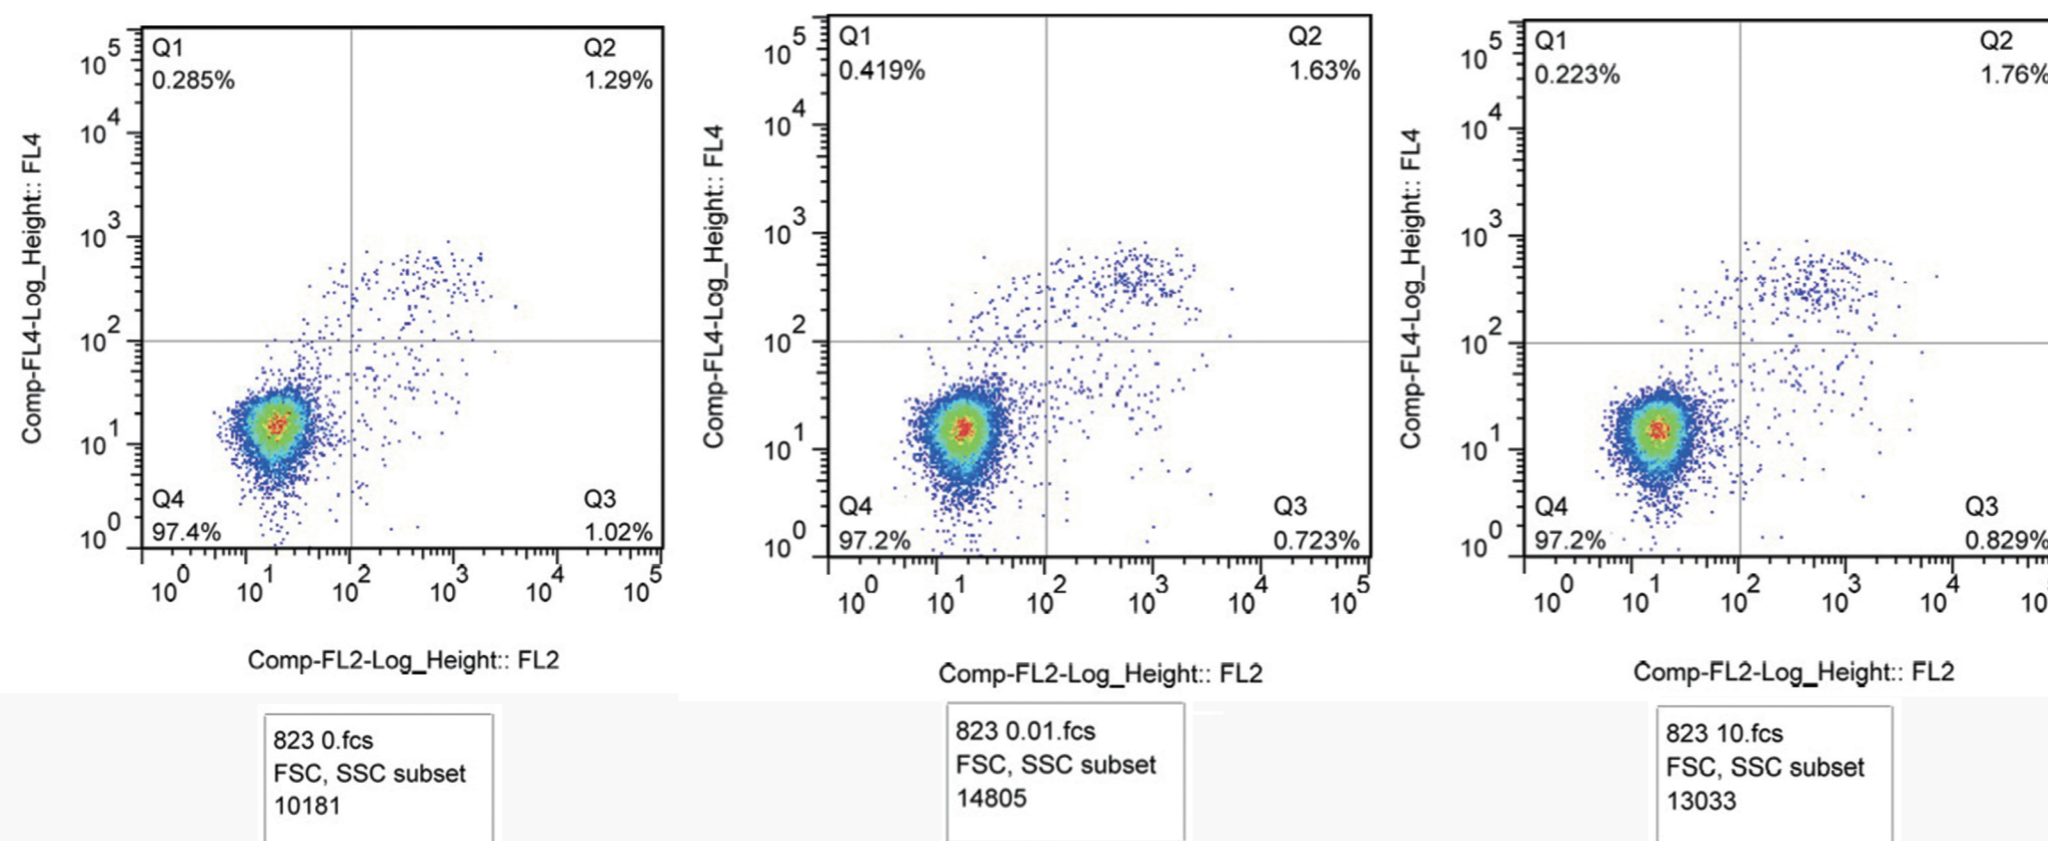

d

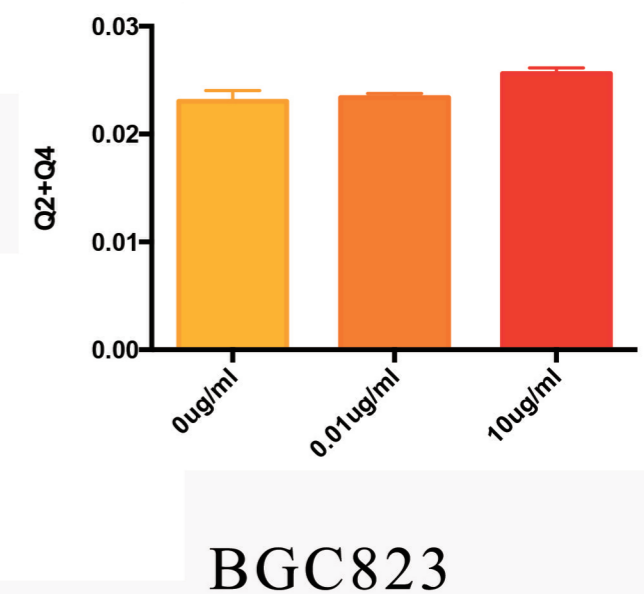

Figure S2. Flow cytometry was used to analyze apoptosis in gastric cancer cells that were co-cultured with CNPs. (a) Flow cytometry was used to analyze apoptosis in MKN28 cells that were co-cultured with different concentrations of CNPs (0 µg/ml, 0.01 µg/ml and 10 µg/ml). (b) Analysis of the addition of Q2 and Q4 to MKN28 cells in different groups. (c) Flow cytometry was used to analyze apoptosis in BGC823 cells that were co-cultured with different concentrations of CNPs (0 µg/ml, 0.01 µg/ml and 10 µg/ml). (d) Analysis of the addition of Q2 and Q4 to BGC823 cells in different groups. Each data point represents the mean ± standard deviation (n=3).

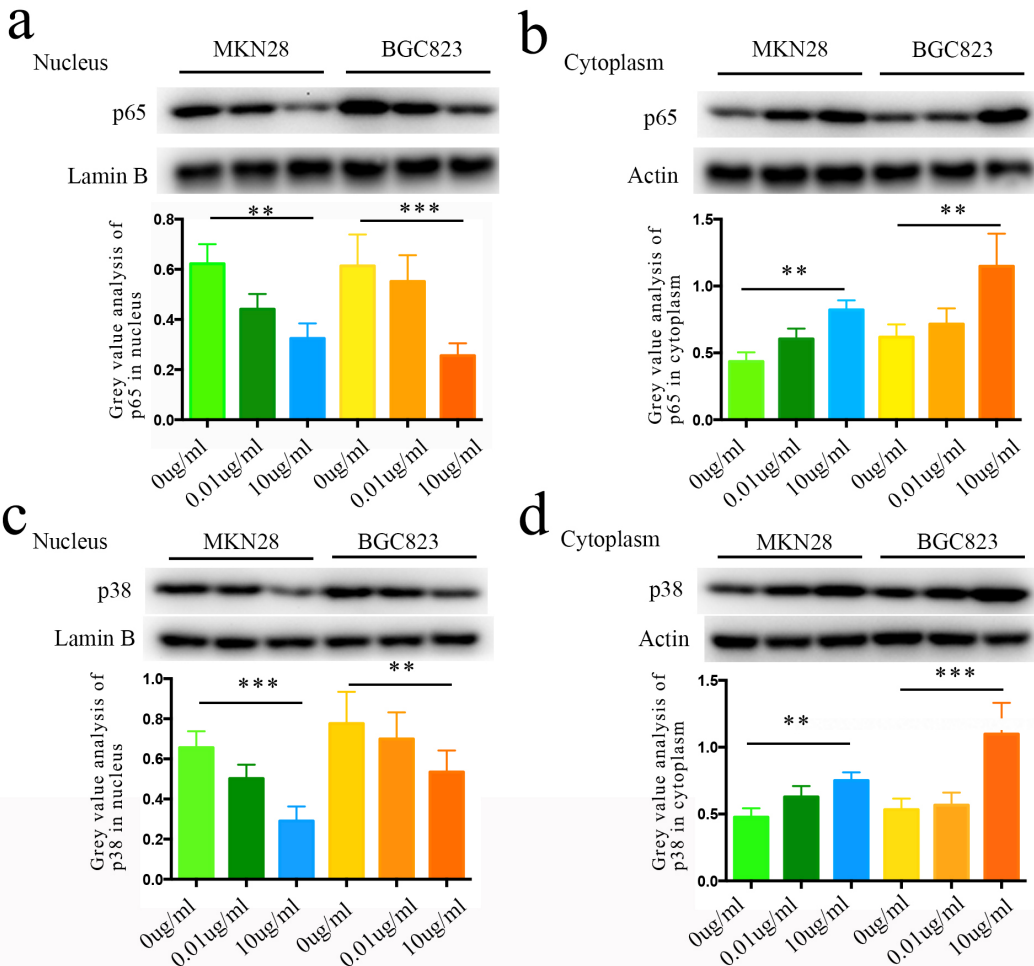

**Figure S3.** The translocation of p65 and p38 in gastric cancer cells that were co-cultured with CNPs. (a & b) The expression of p65 in the nucleus and cytoplasm, after co-cultured with different concentrations of CNPs. (c & d) The expression of p38 in the nucleus and cytoplasm, after co-cultured with different concentrations of CNP. Each data point represents the mean  $\pm$  standard deviation (n=3). \*\* P<0.01, compared with 0  $\mu$ g/ml group, \*\*\*P<0.001, compared with 0  $\mu$ g/ml group.

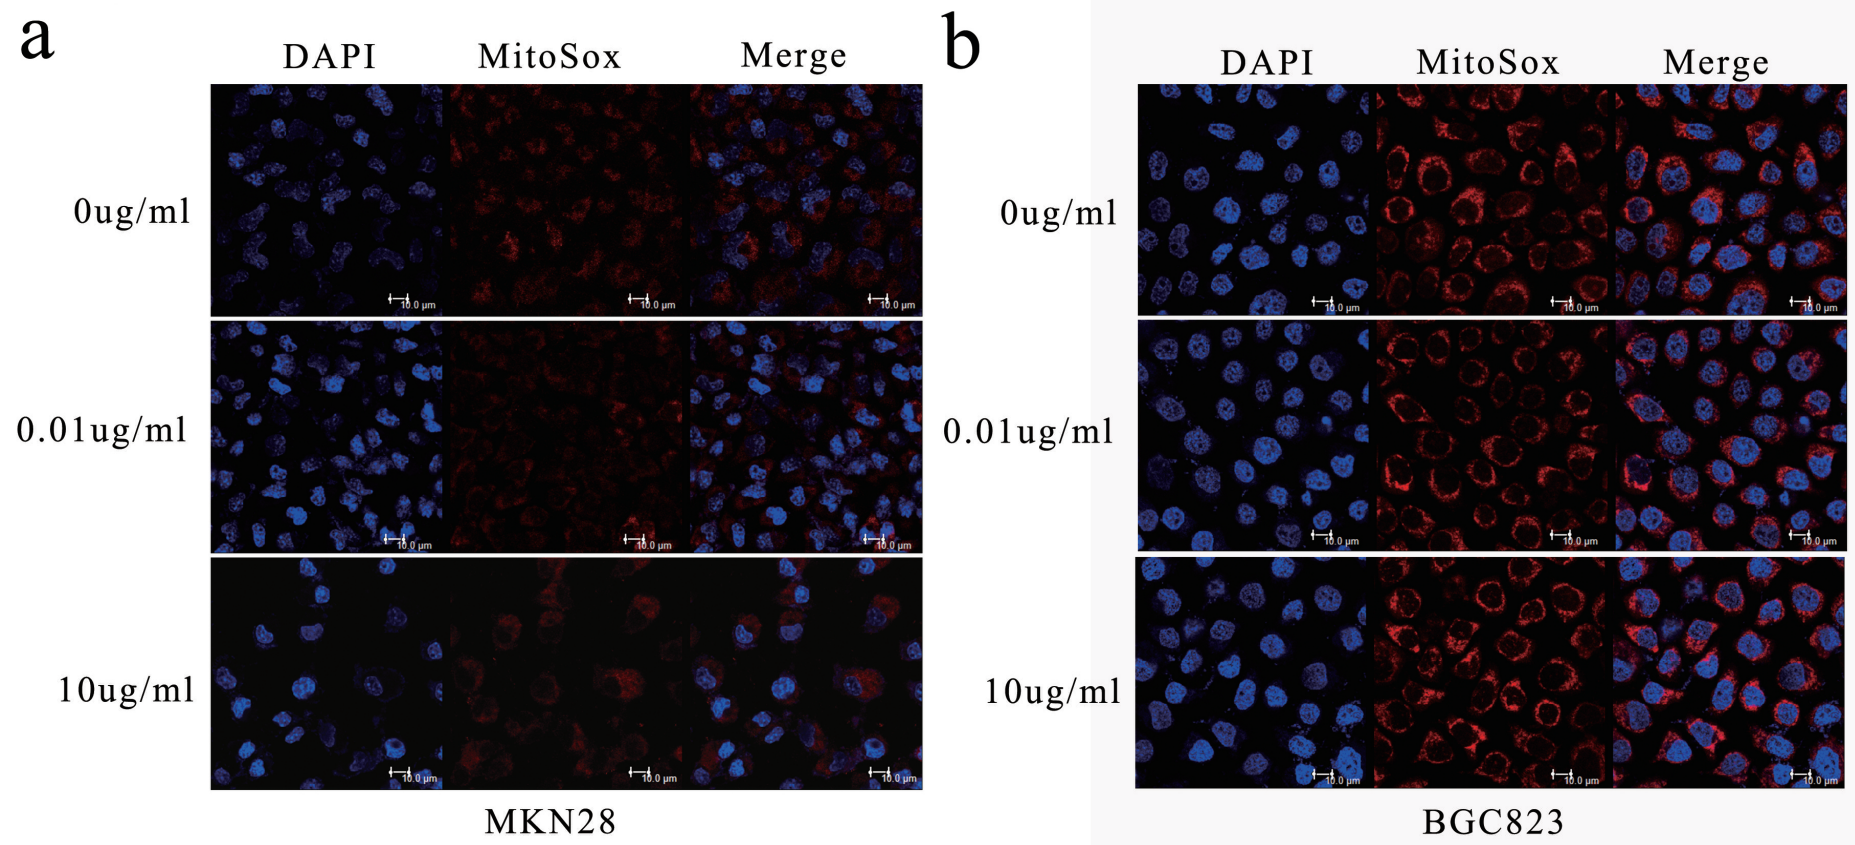

**Figure S4. Immunofluorescence for ROS in gastric cancer cells that were co-cultured with CNPs.**

(a) ROS levels were detected in MKN28 cells that were co-cultured with different concentrations of CNPs (0  $\mu\text{g/ml}$ , 0.01  $\mu\text{g/ml}$  and 10  $\mu\text{g/ml}$ ) using MitoSOX<sup>™</sup> Red Mitochondrial Superoxide Indicator. Each data point represents the mean  $\pm$  standard deviation (n=3). (b) ROS levels were detected in BGC823 cells that were co-cultured with different concentrations of CNPs (0  $\mu\text{g/ml}$ , 0.01  $\mu\text{g/ml}$  and 10  $\mu\text{g/ml}$ ) using MitoSOX<sup>™</sup> Red Mitochondrial Superoxide Indicator. Each data point represents the mean  $\pm$  standard deviation (n=3).



a

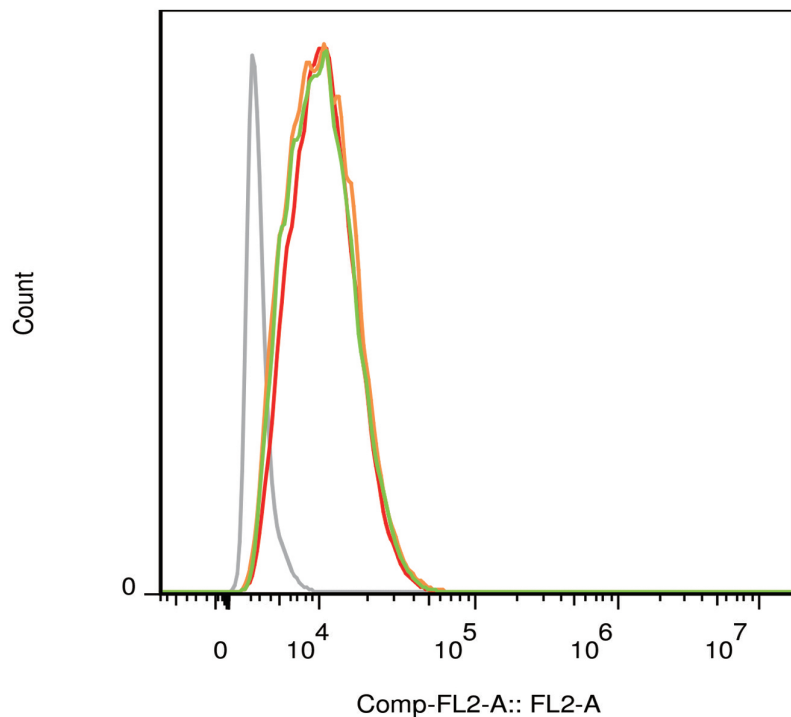

— MKN28-Negative Control  
 — MKN28-0ug/ml  
 — MKN28-0.01ug/ml  
 — MKN28-10ug/ml

b

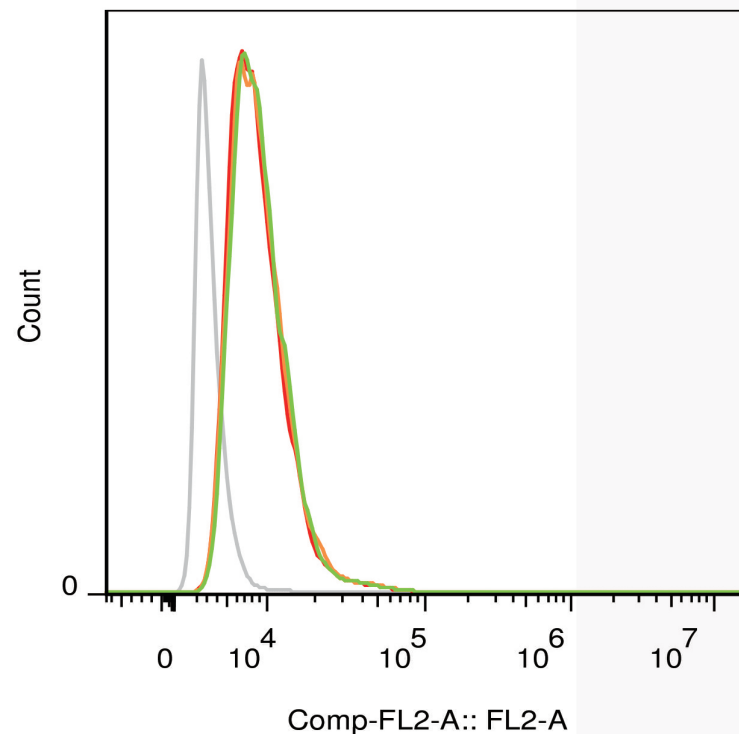

— BGC823-Negative Control  
 — BGC823-0ug/ml  
 — BGC823-0.01ug/ml  
 — BGC823-10ug/ml

**Figure S5. Flow cytometry for ROS in gastric cancer cells that were co-cultured with CNPs.**

(a) ROS levels were detected in MKN28 cells that were co-cultured with CNPs (0  $\mu\text{g/ml}$ , 0.01  $\mu\text{g/ml}$  and 10  $\mu\text{g/ml}$ ) using flow cytometry. In the negative controls, MKN28 cells that were not co-cultured with CNPs were analyzed using MitoSOX<sup>™</sup> Red Mitochondrial Superoxide Indicator. Each data point represents the mean  $\pm$  standard deviation (n=3). (b) ROS levels were detected in BGC823 cells that were co-cultured with CNPs (0  $\mu\text{g/ml}$ , 0.01  $\mu\text{g/ml}$  and 10  $\mu\text{g/ml}$ ) using flow cytometry. In the negative controls, MKN28 cells that were not co-cultured with CNPs were analyzed using MitoSOX<sup>™</sup> Red Mitochondrial Superoxide Indicator. Each data point represents the mean  $\pm$  standard deviation (n=3).

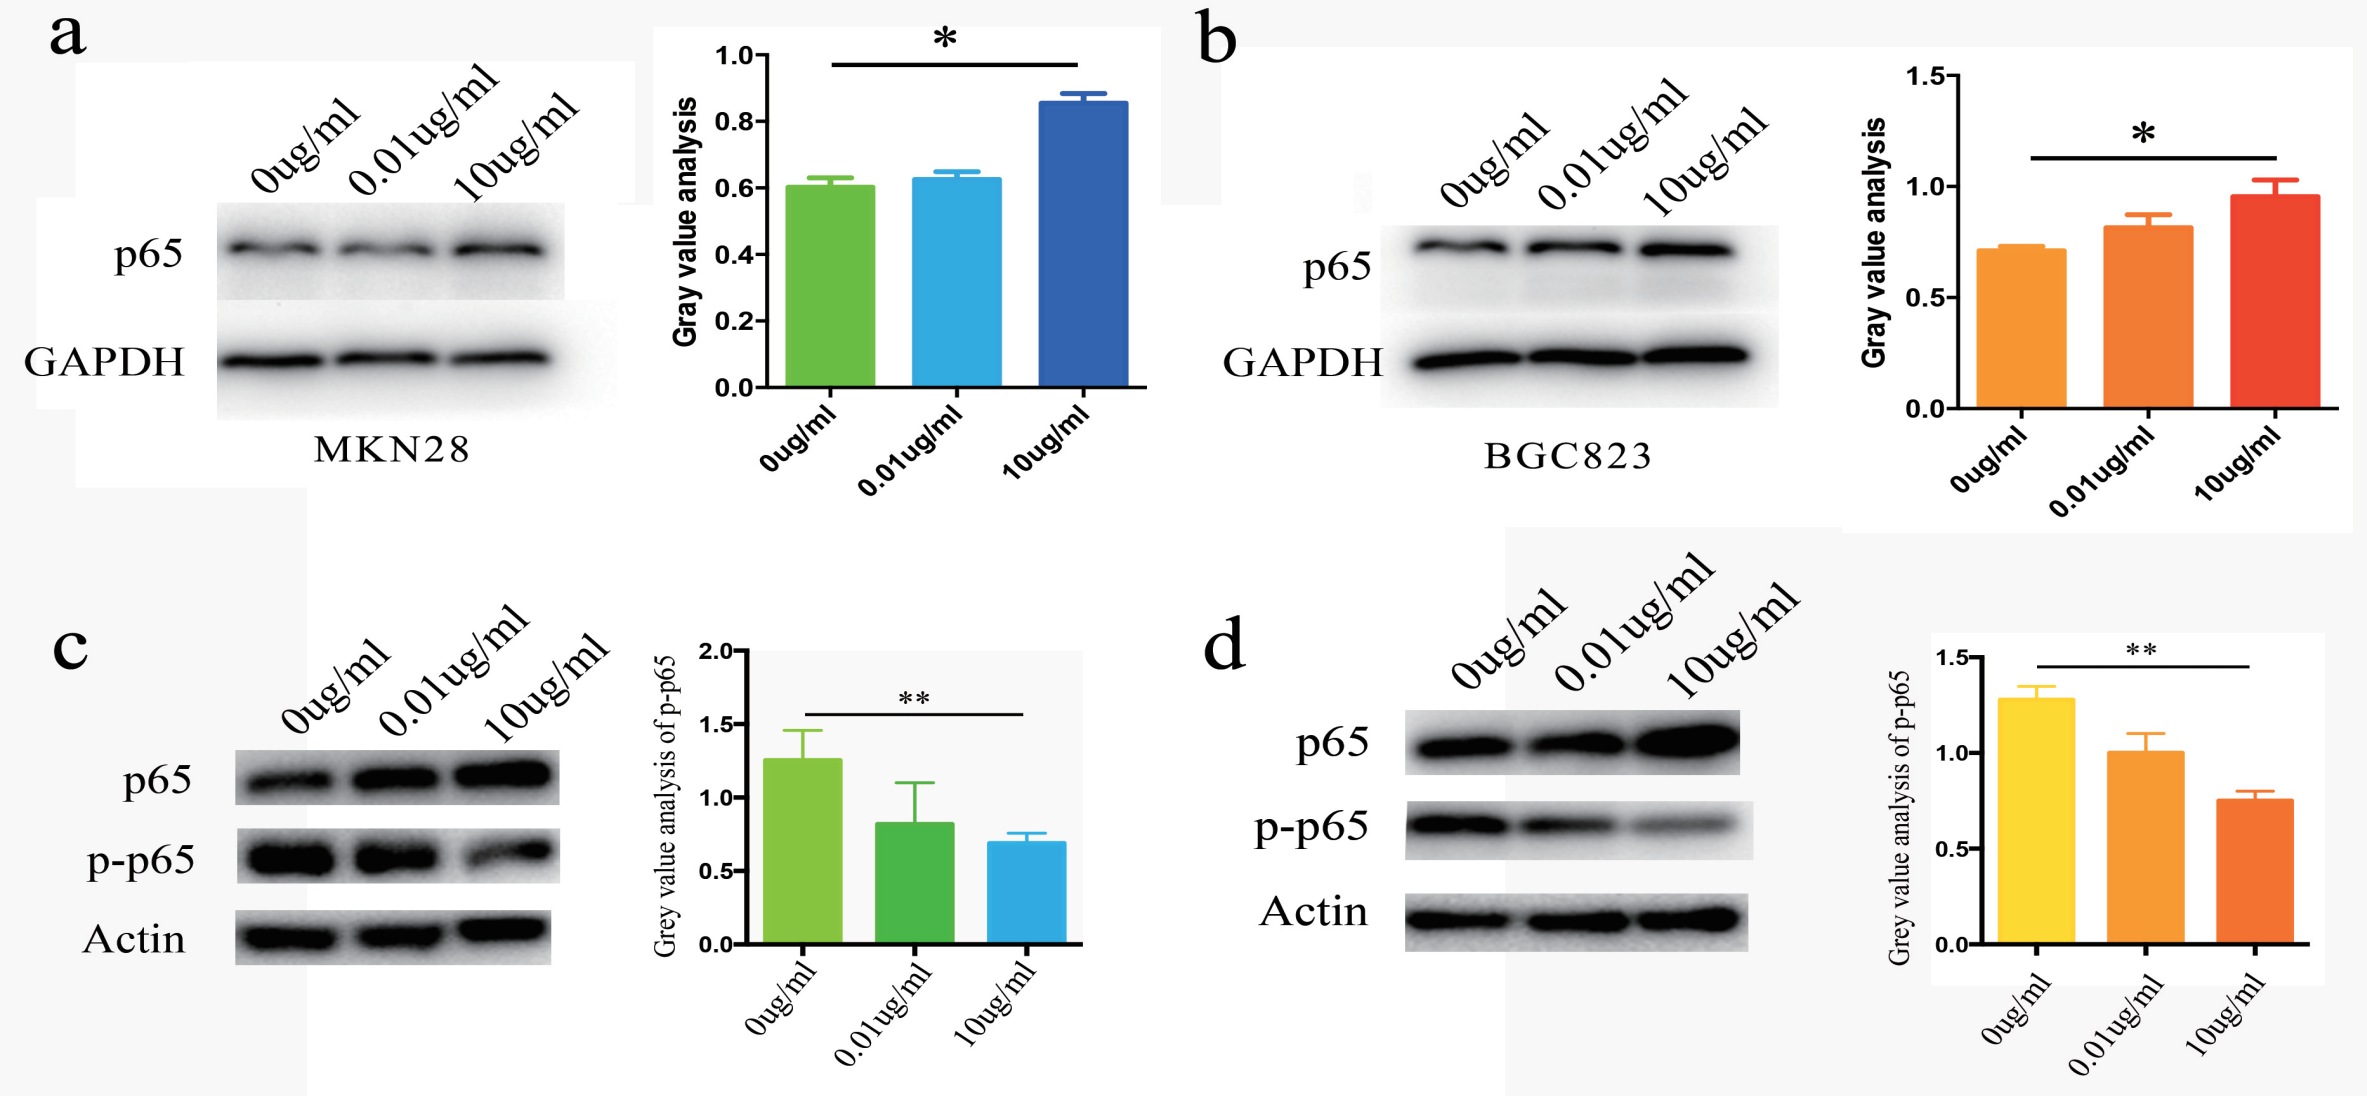

**Figure S6.** The expression of p65 in gastric cancer cells after the cells were co-cultured with different concentrations of CNPs.

(a) Western blot assays show the expression levels of p65 in MKN28 cells. A gray value analysis shows each value of the blot. \* $P < 0.05$ , compared to the 0  $\mu\text{g/ml}$  group. (b)

Western blot assays show the expression levels of p65 in BGC823 cells. A gray value analysis shows each value of the blot. \* $P < 0.05$ , compared to the 0  $\mu\text{g/ml}$  group.

Each data point represents the mean  $\pm$  standard deviation ( $n=3$ ).

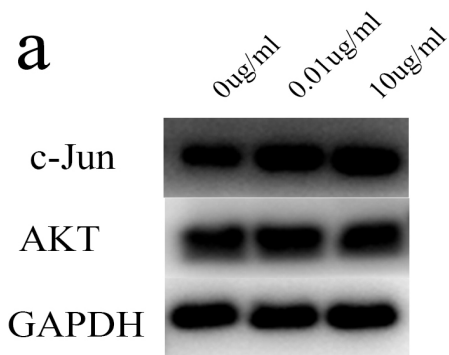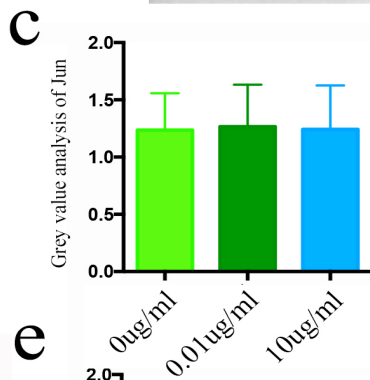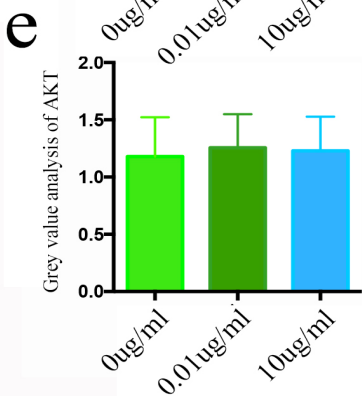

MKN28 group

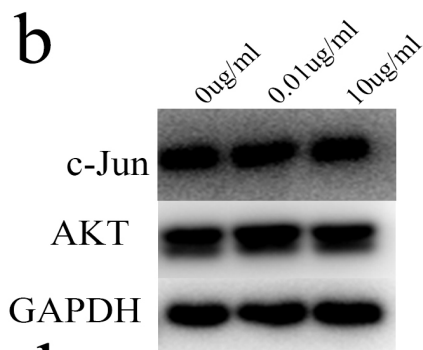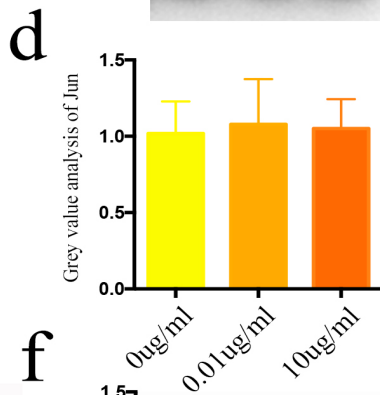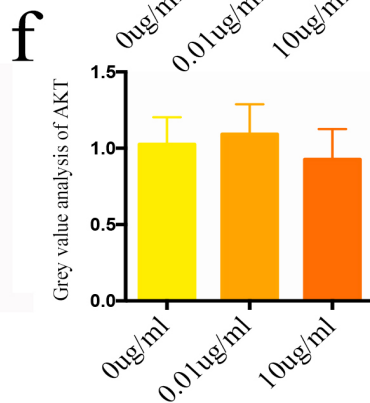

BGC823 group

**Figure S7.** The expression of AKT and c-Jun in the gastric cancer cells that were co-cultured with CNPs. (a, c & e) The expression of c-Jun and AKT in the MKN28 group. (b, d & f) The expression of c-Jun and AKT in the BGC823 group.
